# Supplementary material for: User-friendly tool for the assessment of groundwater contamination risks by long-term irrigation with reclaimed water
Source: Research Square preprint supplement (doi:10.21203/rs.3.rs-7816755/v1), 2026-01-19
Supplement: Supplementary file 1 [file 423a07f6c7f700cbf413b908.docx]

**User-friendly tool for the assessment of groundwater contamination risks by long-term irrigation with reclaimed water**

**Mogens Thalmann1,2*, Tobias L. Hohenbrink3, Sondra Klitzke4, Aki S. Ruhl2,5,Andre Peters6,1**

1 Technische Universität Braunschweig, Institute for Geoecology, Department of Soil Science, Langer Kamp 19c, 38106, Braunschweig, Germany

2 German Environment Agency, Section II 3.3, Water Treatment, Schichauweg 58, 12307, Berlin, Germany

3 Deutscher Wetterdienst (DWD), Agrometeorological Research Center, Bundesallee 33, 38116, Braunschweig, Germany

4 German Environment Agency, Section II 3.1, Protection of Drinking Water Resources, Schichauweg 58, 12307, Berlin, Germany

5 Technische Universität Berlin, Water Treatment, KF4, Str. des 17. Juni 135, 10623, Berlin, Germany

6 Thünen Institute of Agricultural Technology, Bundesallee 50, 38116 Braunschweig, Germany

*Corresponding author Mogens Thalmann: [m.thalmann@tu-braunschweig.de](mailto:m.thalmann@tu-braunschweig.de)

ORCID ID of corresponding author: 0009-0004-1587-1244

**Co-Authors ORICD ID’s:**

Tobias L. Hohenbrink: 0000-0002-5227-0171

Sondra Klitzke: 0000-0001-5895-0074

Aki Sebastian Ruhl: 0000-0002-2443-4722

Andre Peters: 0000-0002-8893-8102

# Supplementary Information

# Additional Information for Material & Method section

## S1.1 Numerical solutions of simulating the water and solute transport in H1D

H1D simulates the one-dimensional variable saturated water flow by numerically solving the modified Richards equation:

|  | (S1) |
| --- | --- |

where, is the water content (cm3 cm-3), is the pressure head (cm), is the vertical coordinate (cm), t the time (h), is a sink term representing root water uptake or another source or sink (h-1), and the unsaturated hydraulic conductivity function. Additional, H1D simulates the solute transport coupled to water flow by solving the advection-dispersion equation (S2) as described in detail in Šimůnek & van Genuchten (2008).

|  | (S2) |
| --- | --- |

In equation (S2), is the solute concentration (µg L-1), is the sorbed concentration (µg kg-1), is the dispersion coefficient which includes molecular diffusion and hydrodynamic dispersion (cm² h-1), q is the volumetric fluid flux density (cm h-1) as described by the Darcy-Buckingham law, and is a sink-source term (µg L-3 h-1) which accounts for various zero- and first-order reactions (e.g. microbial degradation). Within the simulation scenarios, includes the first-order decay reaction thereby considering microbial degradation.

Moreover, the transport of solutes was simulated considering equilibrium linear adsorption (S3), which describes an instantaneous equilibration between liquid solution and solid soil phase.

|  | (S3) |
| --- | --- |

Where is the sorbed concentration (µg kg-1), is the concentration in the liquid phase (µg L-1), and is the linear sorption coefficient (kg L-1).

## S1.2 Evapotranspiration and Interception in H1D

Internally, H1D divides Evapotranspiration(cm day-1) into Transpiration (cm day-1) and Evaporation (cm day-1) according to Lambert-Beer´s law (Ritchie, 1972):

|  | (S4) | |
| --- | --- | --- |
|  | (S5) |

with the canopy radiation extinction constant [-] and , the leaf area index [-] as a function of time . The extinction constant can range between 0.5 and 0.75, depending on the angle of the sun, the plant density and the arrangement of the leaves (Šimůnek et al., 2018). We adopted an extinction constant of 0.5 according to Feifel et al. (2024).

H1D is able to take interception of water by plant and soil surfaces into account under consideration of the daily inflow (cm) and the LAI according to equation (S6).

|  | (S6) |
| --- | --- |

Where is the interception rate (cm day-1), is the daily Inflow (cm day-1), is an empirical constant (-), and is the interception constant (cm day-1), which was set to 0.025 as usual value for an ordinary agricultural crop (Braden, 1985). For the constant , the dimensionless soil cover fraction ( can be used:

|  | (S7) |
| --- | --- |

## S1.3 Control and automatize Hydrus-1D simulations and data processing

A base simulation was first set up with predefined geometric parameters (rooting depth, profile depth), root water uptake models, temporal and spatial discretization, and initial and boundary conditions. This base simulation served as a template for all subsequent simulations. The corresponding project files were then duplicated, and scenario-specific input files were automatically modified or replaced. This process was automated using R (R Core Team, 2022) within the RStudio environment (Posit Team, 2023).

The MATER.IN input file, which defines the hydraulic functions of the PDI model for each differentiated soil texture class, and the ATMOSPH.IN file, which specifies atmospheric boundary conditions, were replaced with scenario-specific tables generated in R. Additionally, key soil hydraulic and reaction parameters—including saturated water content (%), saturated hydraulic conductivity (Ksat, cm day-1), bulk density (g cm-3), sorption parameters (Kd, L kg-1), and degradation rate constants (day-1)—were modified in the SELECTOR.IN file by replacing predefined dummy values from the base simulation using the “stringr” package (Wickham et al., 2023a).

Once all Hydrus-1D project folders were generated with the customized input files, the simulations were executed sequentially using the call.H1D command from the “hydrusR” package (Acharya, 2020).

For post-processing, the “kwb.hydrus1D” package (Ruster, 2025) was used to iteratively extract data from the T_Level.OUT and solute.OUT files, containing results for water and solute transport, respectively. All visualizations were created using the “ggplot2” package (Wickham et al., 2023b).

## S1.4 Irrigation and atmospheric boundary conditions


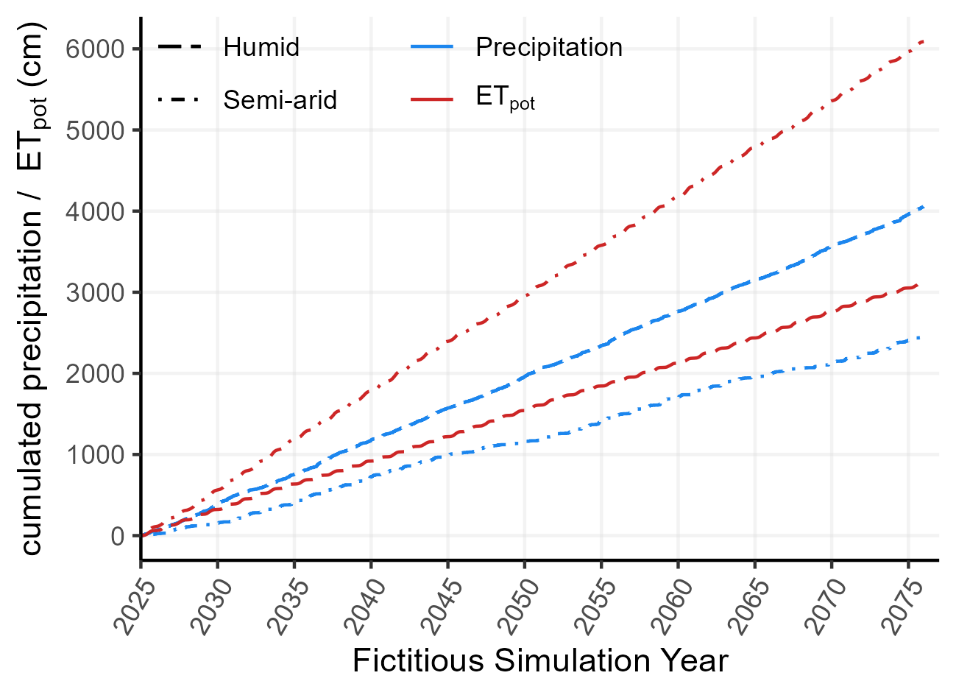


Figure S1: Cumulative precipitation and for the humid and semi-arid climate of the total 51 years simulation period.

Table S1: Information on irrigation height in scenario combinations differing in the irrigation (soil type, climate, irrigation).

| Soil type | Climate | Irrigation | Mean yearly Irrigation | Standard Deviation (n = 50) | Cumulated irrigation (50 years) |
| --- | --- | --- | --- | --- | --- |
|  |  |  | cm | | |
| clay | humid | all-season | 62.7 | 4.32 | 3135 |
| clay | humid | demand-based | 22.3 | 4.32 | 1115 |
| clay | semi-arid | all-season | 132.8 | 4.30 | 6639 |
| clay | semi-arid | demand-based | 47.5 | 4.55 | 2376 |
| clay loam | humid | all-season | 60.9 | 4.32 | 3045 |
| clay loam | humid | demand-based | 21.7 | 4.32 | 1083 |
| clay loam | semi-arid | all-season | 130.9 | 4.30 | 6543 |
| clay loam | semi-arid | demand-based | 46.8 | 4.48 | 2340 |
| loam | humid | all-season | 63.7 | 4.32 | 3186 |
| loam | humid | demand-based | 22.7 | 4.32 | 1133 |
| loam | semi-arid | all-season | 133.8 | 4.30 | 6692 |
| loam | semi-arid | demand-based | 47.9 | 4.58 | 2395 |
| loamy sand | humid | all-season | 53.8 | 4.34 | 2690 |
| loamy sand | humid | demand-based | 19.1 | 4.34 | 956 |
| loamy sand | semi-arid | all-season | 122.3 | 4.25 | 6114 |
| loamy sand | semi-arid | demand-based | 43.5 | 4.25 | 2177 |
| sandy loam | humid | all-season | 60.1 | 4.32 | 3007 |
| sandy loam | humid | demand-based | 21.4 | 4.32 | 1069 |
| sandy loam | semi-arid | all-season | 130.1 | 4.31 | 6504 |
| sandy loam | semi-arid | demand-based | 46.5 | 4.45 | 2325 |

# Process-based leaching simulations

## S2.1 Comparison of the simulated and fitted leaching


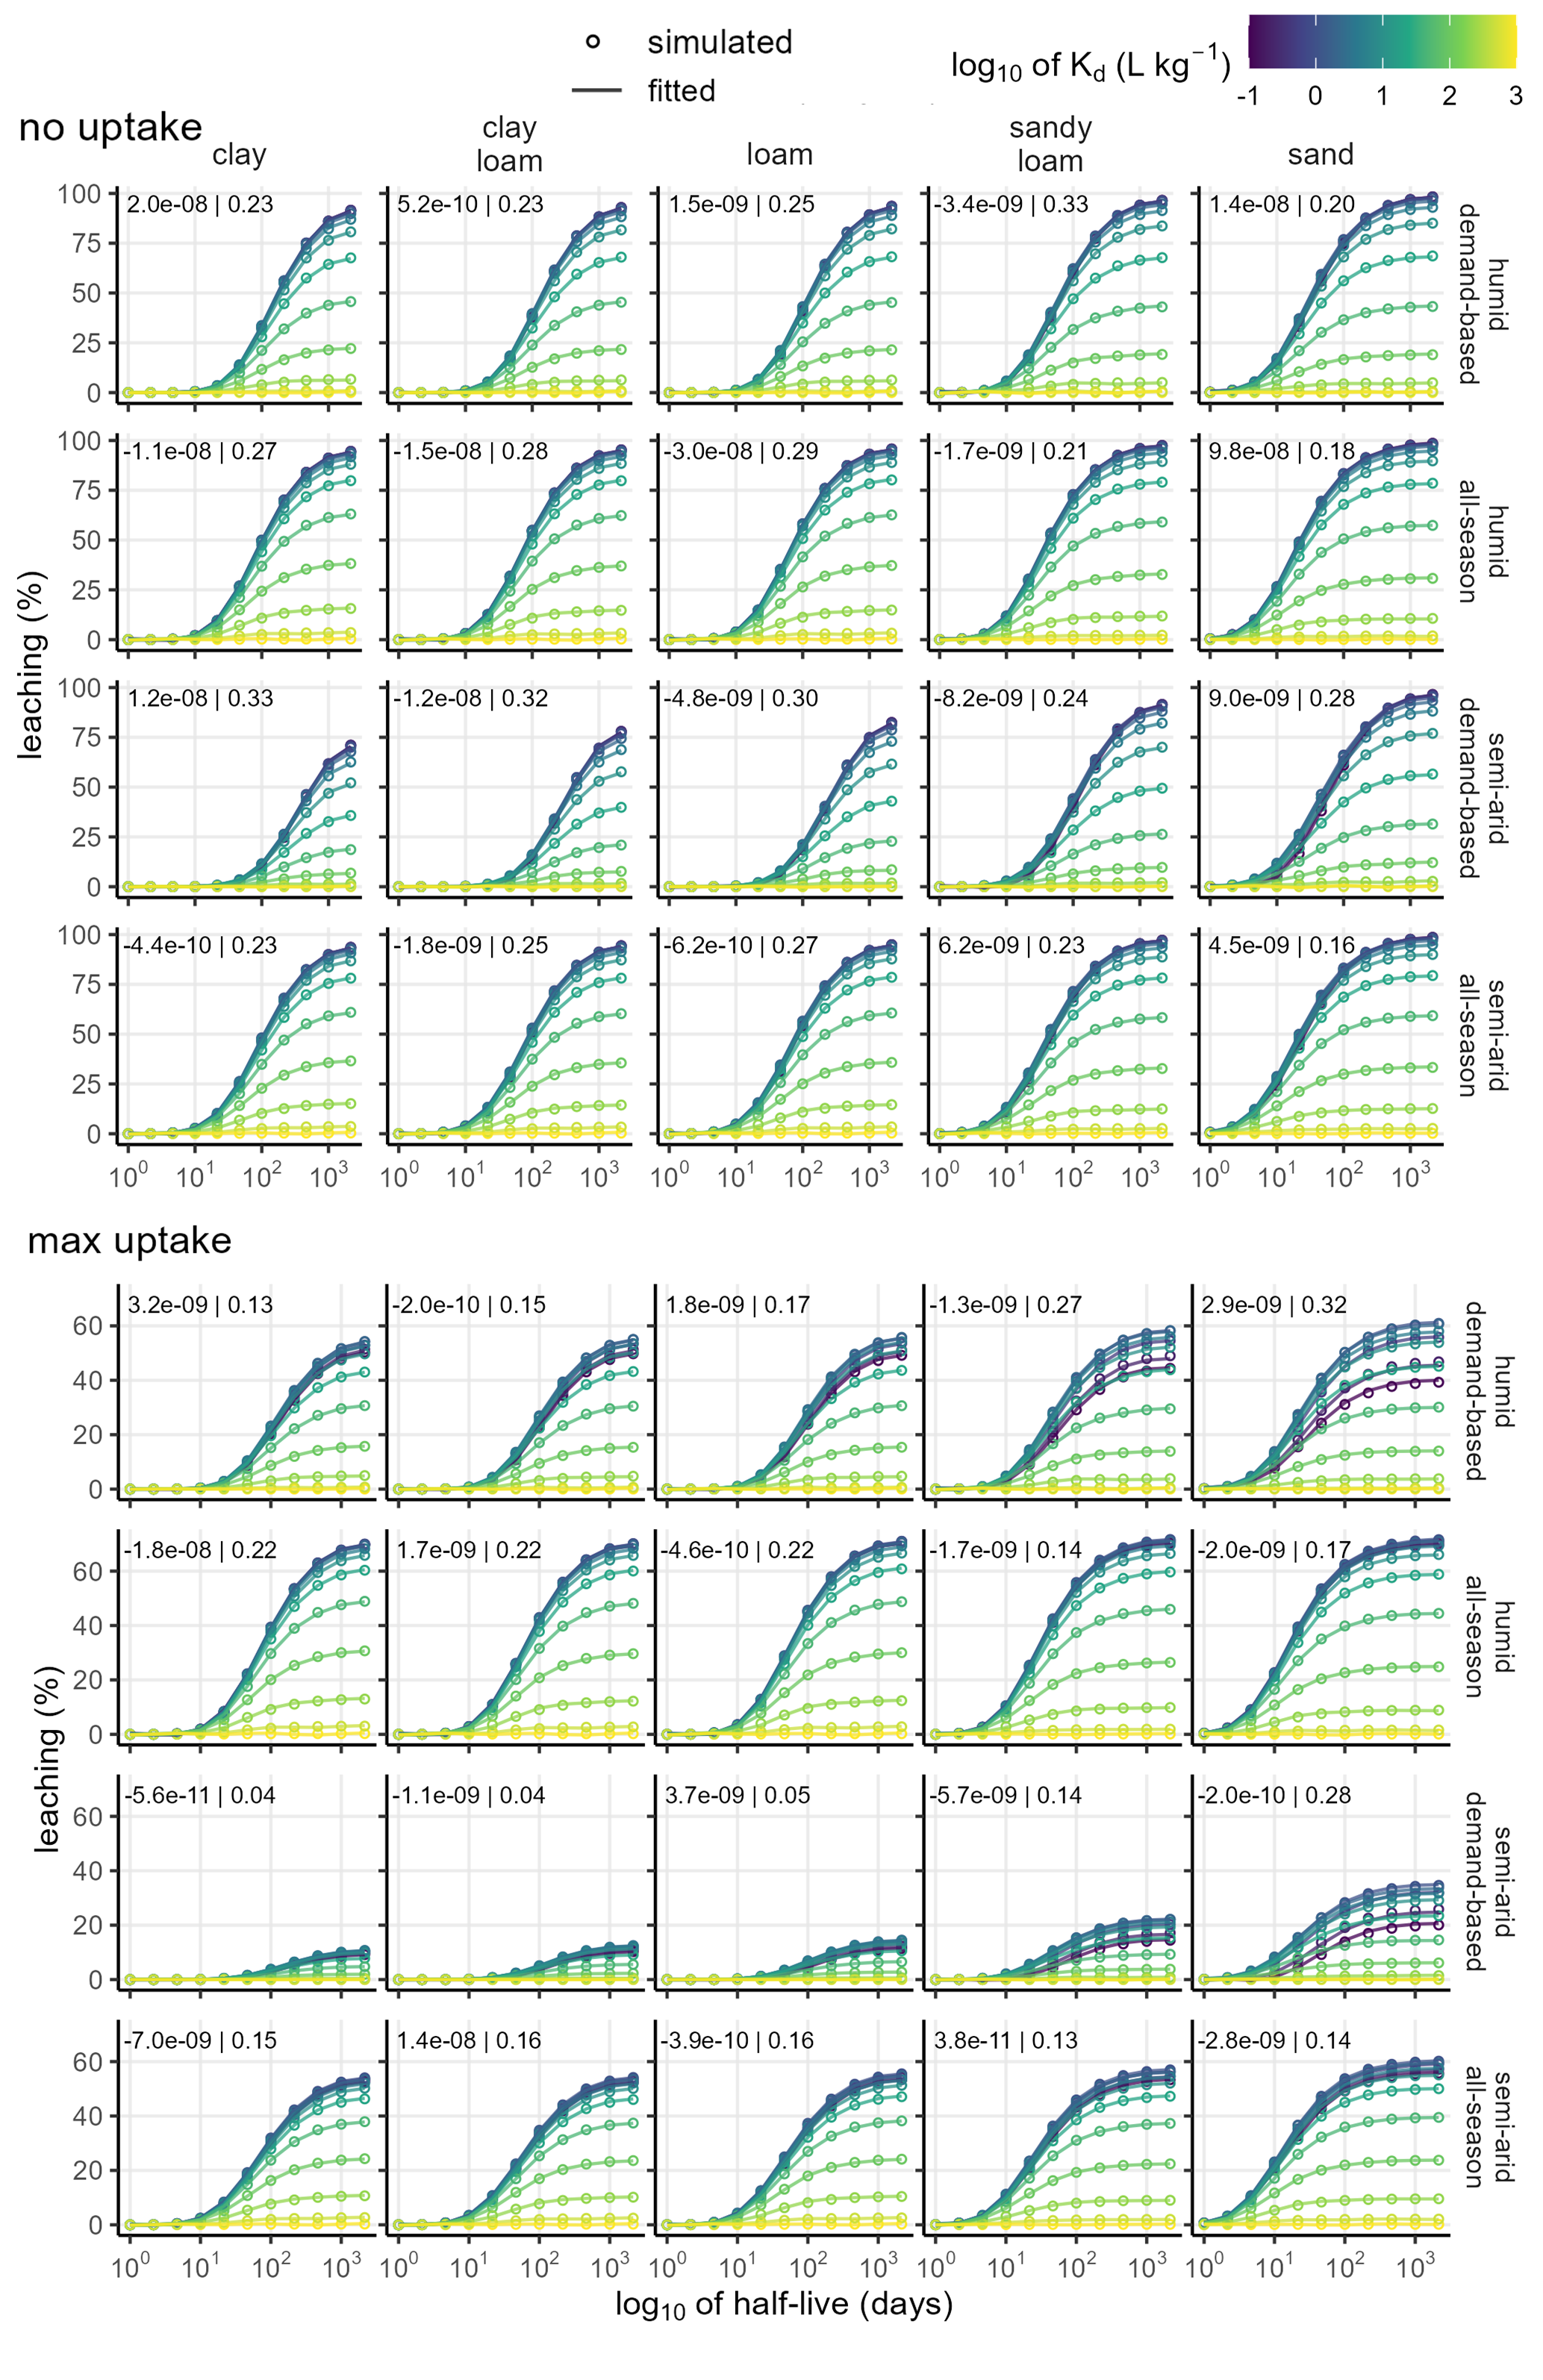


Figure S2: Comparison between simulated (H1D outputs) and fitted (Fourier cosine series of 7th order) solute leaching (%) at lower system´s boundary (2 m) as function of log10 half-live values (days). Each subplot represents a discrete site-specific condition as combination of soil type, irrigation scenario and climate, and solute uptake mode. The continuous color grade shows the log10 values of the varied sorption parameters. The first value in upper left corner of each subplot indicate the mean error (ME), the second the RMSE indicating the goodness of the prediction fit.


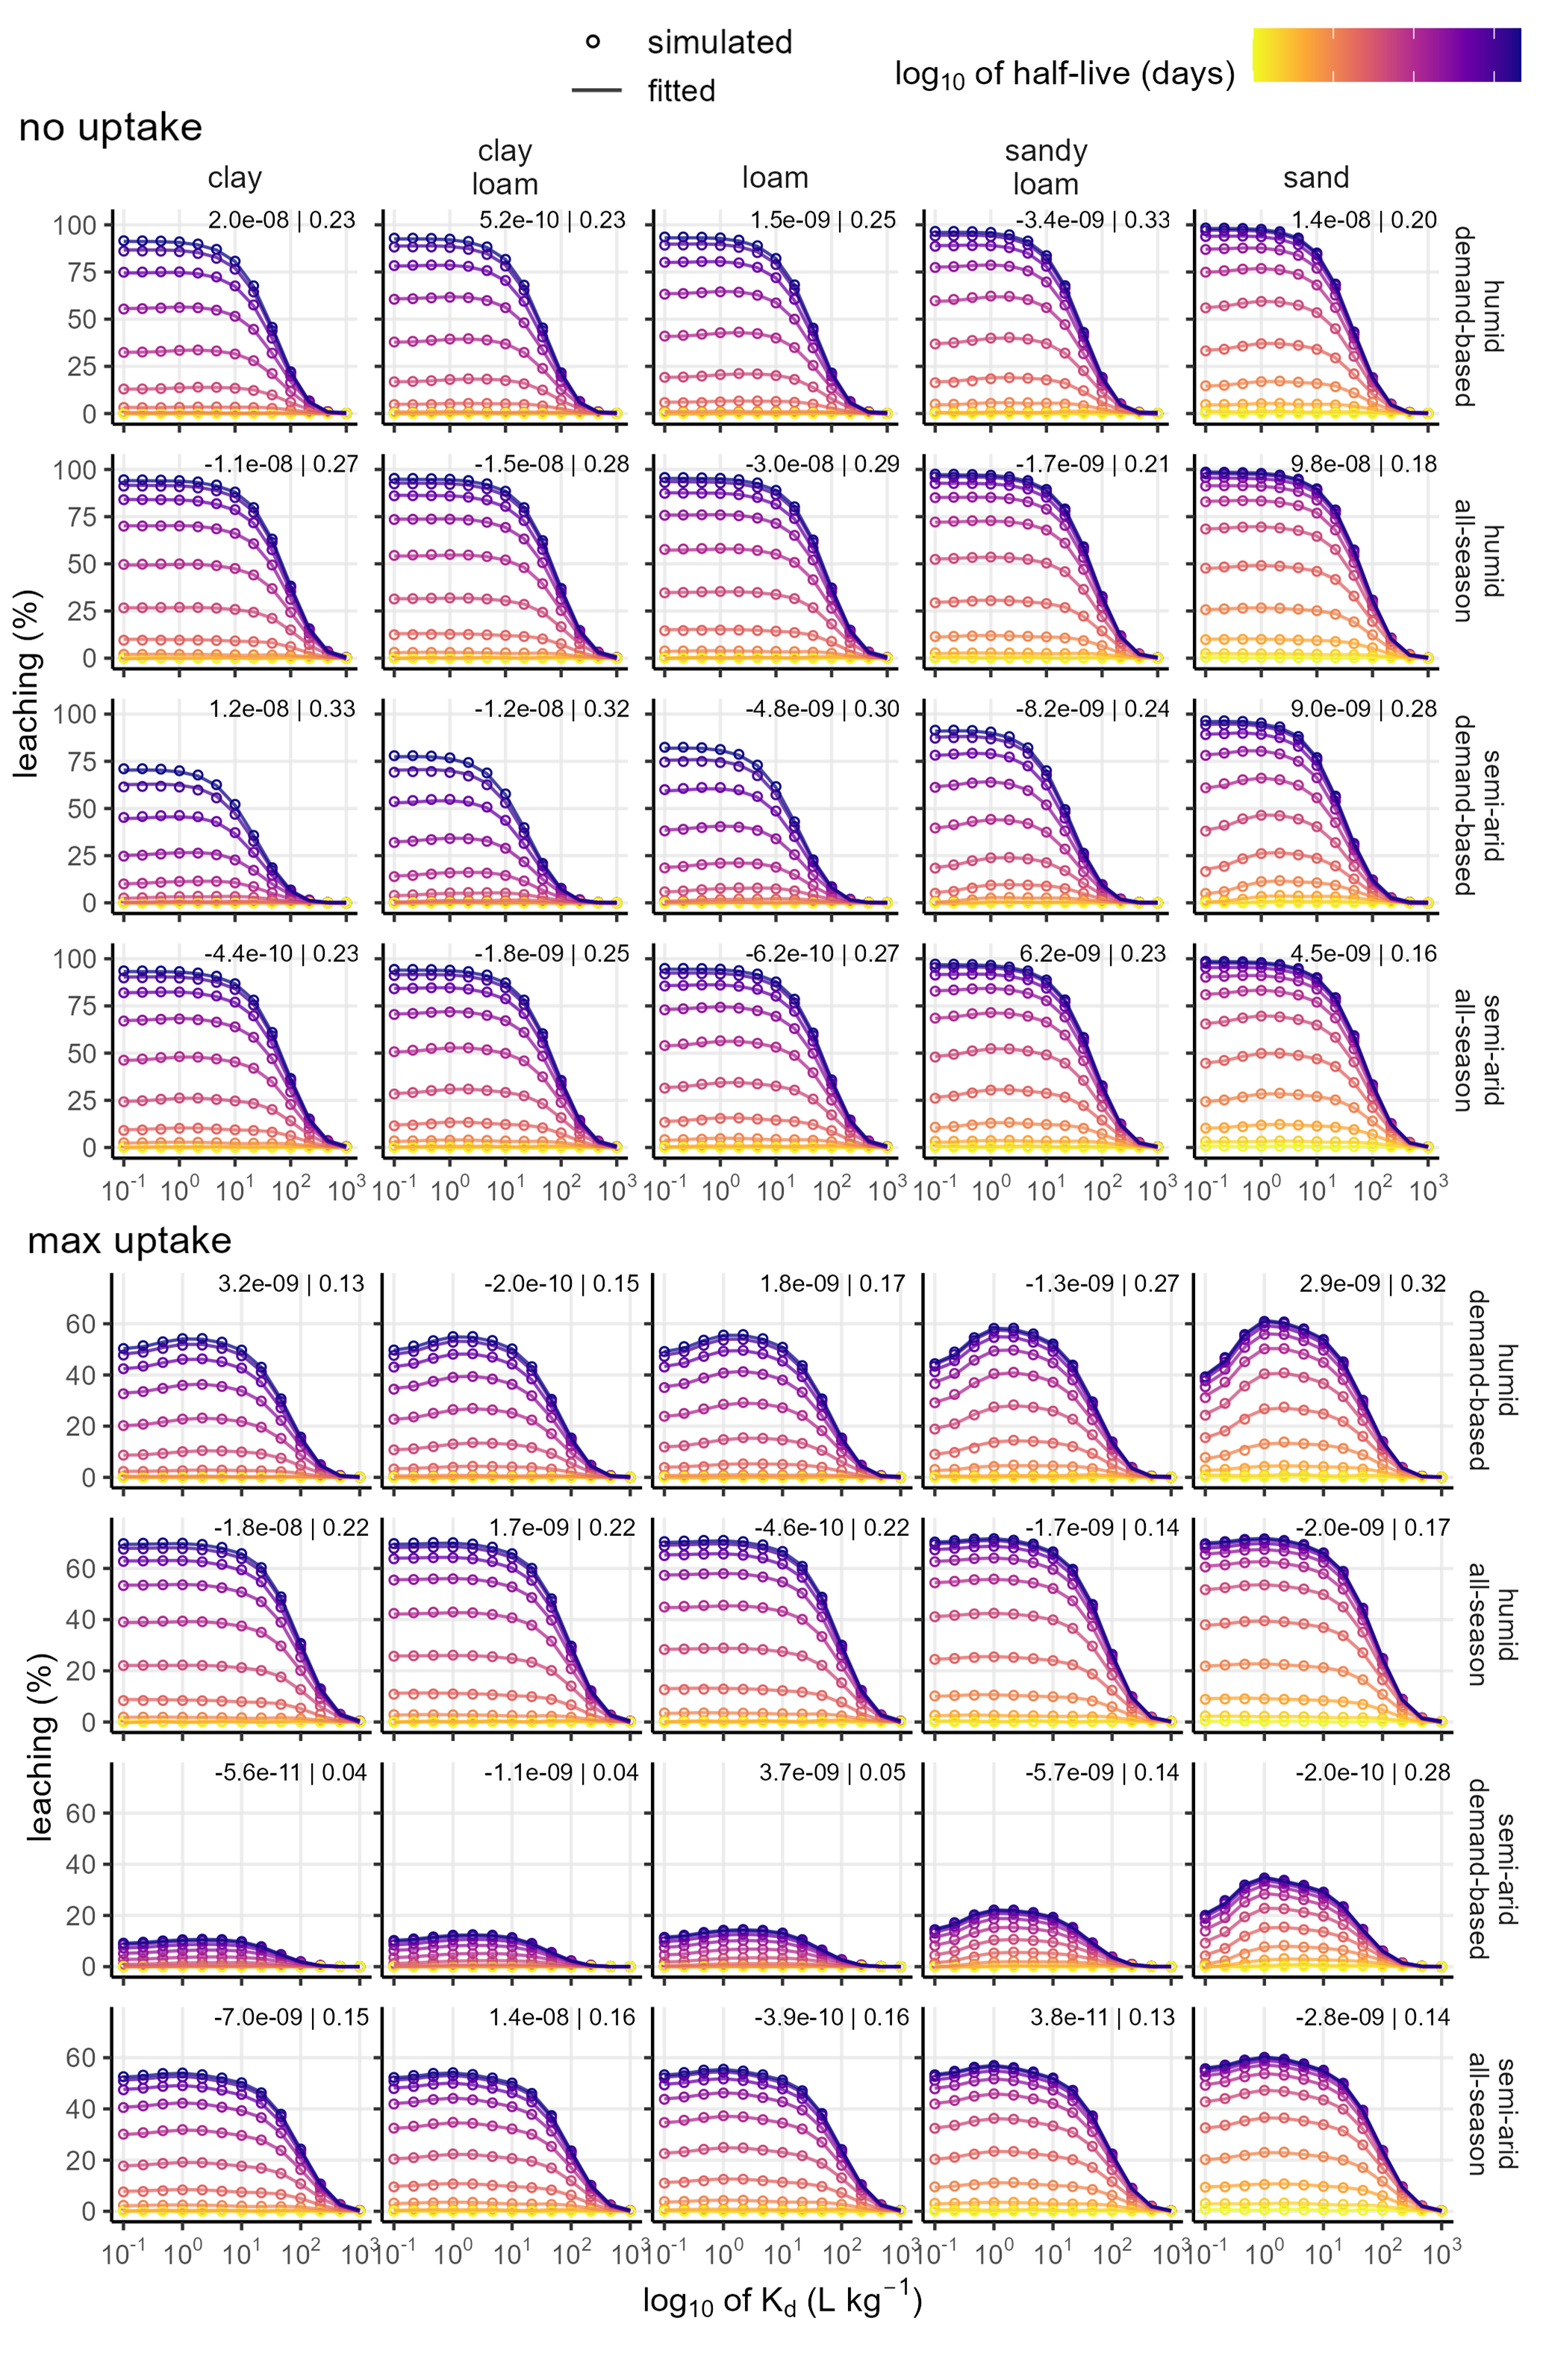


Figure S3: Comparison between simulated (H1D outputs) and predicted (fitted by a Fourier cosine series of 7th order) solute leaching (%) at lower system´s boundary (2 m) as function of log10 Kd values (L kg-1). Each subplot represents a discrete site-specific condition as combination of soil type, irrigation scenario and climate, and solute uptake mode. The continuous color grade shows the log10 values of the varied sorption parameters. The first value in upper left corner of each subplot indicate the mean error (ME) in %, the second the RMSE (unit %) indicating the goodness of the prediction fit.

## S2.2 Description of the model equation

To fit a bivariate Fourier cosine series of 7th order to the data, the log10 transformed values of the predictor variables (Kd and half-live) needed to be rescaled on values between 0 and first, so that the smallest value in the range equals 0 and the highest value equals . Subsequently, the fitted equation is formulated as:

|  | (S8) |
| --- | --- |

where z is the leaching (%) in 2 m depth, is the Kd values log10transformed and scaled between 0 and , and is the half-live values log10transformed and scaled between 0 and .

## S2.3 Non-monotonicity of leaching as function of Kd

Several non-monotonic patterns were observed, where leaching initially increases, reaching a maximum at approximately 3 L kg⁻¹, before subsequently decreasing in a sigmoidal manner (Figure S3). This effect is particularly pronounced in coarse-textured soils, suggesting that solute residence time plays a key role in this phenomenon. However, as Kd continues to increase beyond 3 L kg⁻¹, leaching generally declines until it reaches 0 % at Kd of 1000 L kg⁻¹, irrespective of degradation rates or site-specific conditions. This complete reduction in leaching occurs due to strong sorption within the 30 cm plough horizon, effectively immobilizing the solutes.

Figure S5 presents cumulative degradation, bottom flux, and the cumulative water balance (total infiltration from precipitation and irrigation minus actual evapotranspiration) for a representative scenario exhibiting a distinct non-monotonic trend (sand soil, semi-arid climate, demand-based irrigation, no solute uptake by plants, and a half-live of 46 days). As shown, cumulative degradation is highest at Kd of 0.1 L kg⁻¹, while bottom flux remains lower than at Kd of 1 L kg⁻¹. During periods of negative water balance (April to October), solutes accumulate in the root zone when no plant uptake occurs. These solutes are then transported to deeper layers during periods of positive water balance in winter (October to April).

These findings suggest that the initial increase in leaching at low sorption values (Kd < 3 L kg⁻¹) results from reduced bioavailability for microbial degradation and plant uptake, as both processes require solutes to be present in the liquid phase. This interpretation aligns with previous studies reporting that sorption limits solute bioavailability, thereby reducing degradation and plant uptake (Ghafoor et al., 2011; Ren et al., 2018).


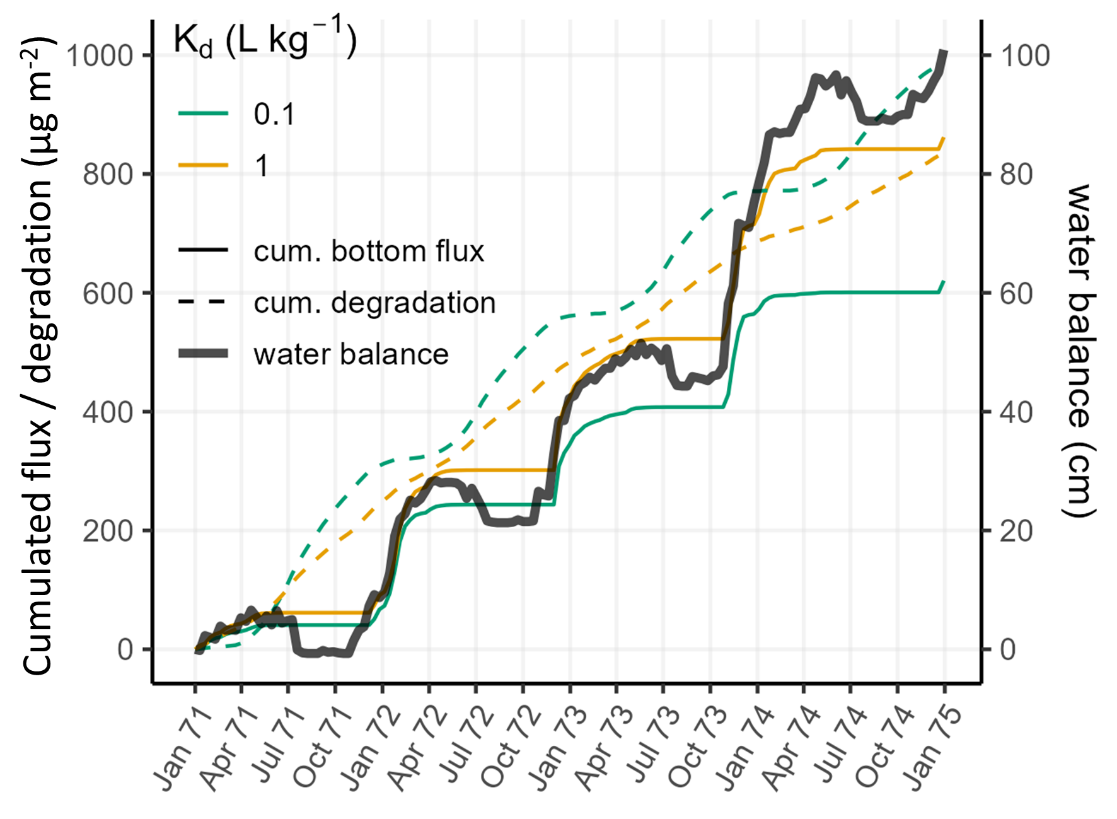


Figure S5: Cumulated fluxes (degradation and bottom outflux) and cumulative water balance in sand soil under semi-arid climate, demand-based irrigation, and no solute uptake by plants at a half-live of 46 days for Kd values 0.1 and 1 L kg-1 in the final 4 years simulation period (2071 – 2074). Water balance is calculated as cumulated infiltration (precipitation + irrigation) subtracted by the actual cumulated evapotranspiration.

# Notes for tool users

## S3.1 Use of the prediction tool and obtaining the needed reaction parameters

To obtain a leaching prediction from the Excel-based tool (available in the ZENODO repository at DOI: <https://doi.org/10.5281/zenodo.17287510>; Thalmann et al., 2025), the user must first select the most appropriate site-specific conditions from the 40 discrete scenario options, which include soil type, climate, irrigation mode, and solute plant uptake mode. Additionally, the desired prediction timespan (5, 10, 20, 30, or 50 years after the start of irrigation) must be specified.

Next, the user must enter sorption (Kd) and degradation (half-live/DT₅₀) values for the substance of interest. Ideally, these parameters should be determined experimentally for the specific soil and environmental conditions under investigation or obtained from reliable literature sources where conditions closely match those of the site. However, in many cases, such reaction parameters are unavailable or unsuitable for the site-specific conditions. Conducting laboratory experiments to determine these values is often labor-intensive, time-consuming, and requires well-established analytical methods.

When experimental data are lacking, model-based approaches can provide alternative estimates for sorption and degradation parameters (Mamy et al., 2014). Numerous sorption models exist for predicting Kd and KOC (the Kd normalized to the organic carbon content of the soil) values of contaminants in soils, based on molecular properties and soil characteristics (e.g., Franco & Trapp, 2008; Barron et al., 2009; Limmer & Burken, 2014; Li et al., 2020; Sigmund et al., 2020; Zhang et al., 2024). A comprehensive review by Mamy et al. (2014) summarizes various prediction models for the fate of organic compounds in environmental compartments, including quantitative structure-activity relationships (QSARs) that estimate sorption (Kd, KOC) in soils based on molecular properties.

In contrast, predictive models for biodegradation in soils remain scarce. A recent study by Rietra et al. (2024) developed a multiple linear regression model to predict Kd and half-live values for eight antibiotics, utilizing soil properties (i.e., pedotransfer functions). Such approaches may help improve degradation estimates where experimental data are unavailable.

## S3.2 Correcting the degradation parameters by soil depth, temperature and moisture

A reduction of the microbial degradation with increasing soil depth (Ghafoor et al., 2011; Rietra et al., 2024; Veeh et al., 1996) is associated with decreased microbial activity in deeper soil layers (Naylor et al., 2022), which in turn is correlated with the organic matter distribution (Veeh et al., 1996). A depth-dependent correction for the degradation is considered in the conducted H1D simulations adopted by the FOCUS groundwater scenarios (FOCUS, 2021), which considers a reduction of the degradation rate with increasing soil depth derived from empirical observations found in literature. The according depth correction factors are 1, 0.5, 0.3, and 0 for 0 - 30, 30 - 60, 60 – 100, and > 100 cm, respectively. Using this approach, it is possible to parametrize degradation for the entire soil profile by use of the topsoil degradation parameter, as commonly degradation is tested solely for the topsoil layer.

Moreover, microbial degradation in soils may depend strongly on environmental factors such as soil temperature and moisture (Campan et al., 2023; FOCUS, 2021). In the pesticides leaching model “FOCUS PELMO” (FOCUS, 2021) these impacts are considered by an internal coupling to soil temperature and moisture dynamics. With reference to FOCUS (2021) we want to briefly explain how experimentally driven degradation rate constants can roughly be corrected by the tool user regarding temperature and moisture conditions to be more suitable to the conditions of the site of interest.

Firstly, regarding a temperature correction, FOCUS (2021) uses the Arrhenius-based Q10-rule, which describes the temperature dependency of chemical and biological reactions. Accordingly, a correction factor can be calculated by:

|  | (S9) |
| --- | --- |

where, is the temperature correction factor (-), is the factor for rate increase given a temperature rise of 10 °C, is the reference temperature of the experimental condition (°C), and is the actual soil temperature (°C). The recommended default value for the values is 2.58 (FOCUS, 2021). As a rough external correction of the half-live or degradation rate constant, the tool user can estimate a mean yearly soil temperature (e.g. in 20 cm depth) of the site of interest (if information is available), and correct the parameter by multiplying with the estimated value. However, in a recent study by Campan et al. (2023) three common Arrhenius-based temperature correction models for degradation of pesticides were compared. As a result, the authors reported that a constant factor (equaling to a constant activation energy) is not valid to describe the temperature dependency of biodegradation for the whole temperature range (especially for higher temperatures such as in tropical soils). Nonetheless, in a temperature range between 5 to 20 °C the above described correction approach is robust.

Secondly, again with reference to FOCUS (2021), the effect of soil moisture can be con considered using a model proposed by Walker (Walker, 1978; Walker & Barned, 1981):

|  | (S10) |
| --- | --- |

where, is the soil moisture correction factor for the biodegradation, is the current volumetric soil moisture in the respective soil layer (%), is the moisture during the degradation experiment (%), and is the empirical exponent describing the moisture dependency (-), for which the default value is 0.7 (FOCUS, 2021). Accordingly, the tool user may calculate a mean moisture content of the topsoil layer for the site of interest (if such data is available), to use this as in equation S3 to obtain a moisture correction factor.

# References

Acharya, S. (2020). hydrusR: Interface for preprocessing, execution and visualization of HYDRUS-1D simulations. R package version 1.0.0. https://CRAN.R-project.org/package=hydrusR

Barron, L., Havel, J., Purcell, M., Szpak, M., Kelleher, B., & Paull, B. (2009). Predicting sorption of pharmaceuticals and personal care products onto soil and digested sludge using artificial neural networks. *The Analyst, 134*, 663. doi:10.1039/b817822d

Braden, H. (1985). Ein Energiehaushalts-und Verdunstungsmodell für Wasser- und Stoffhaushaltsuntersuchungen landwirtschaftlich genutzter Einzugsgebiete. Mitteilungen Dtsch. Bodenkundliche Gesellschaft 42, 294–299.

Campan, P., Samouelian, A., & Voltz, M. (2023). Evaluation of temperature corrections for pesticide half-lives in tropical and temperate soils. *Environmental Science and Pollution Research, 30*, 21468–21480. doi:10.1007/s11356-022-23566-9

Feifel, M., Durner, W., Hohenbrink, T. L., & Peters, A. (2024). Effects of improved water retention by increased soil organic matter on the water balance of arable soils: A numerical analysis. *Vadose Zone Journal, 23*. doi:10.1002/vzj2.20302

FOCUS. (2021). Generic Guidance for Tier 1 FOCUS Ground Water Assessments. Version 2.3. *Generic Guidance for Tier 1 FOCUS Ground Water Assessments. Version 2.3.* Retrieved from https://esdac.jrc.ec.europa.eu/public_path/projects_data/focus/gw/docs/Generic_guidance_FOCUS_GW_V2-3final.pdf

Franco, A., & Trapp, S. (2008). Estimation of the soil–water partition coefficient normalized to organic carbon for ionizable organic chemicals. *Environmental Toxicology and Chemistry, 27*, 1995–2004. doi:10.1897/07-583.1

Ghafoor, A., Moeys, J., Stenström, J., Tranter, G., & Jarvis, N. J. (2011). Modeling Spatial Variation in Microbial Degradation of Pesticides in Soil. *Environmental Science* & *Technology, 45*, 6411–6419. doi:10.1021/es2012353

Grossberger, A., Hadar, Y., Borch, T., & Chefetz, B. (2014). Biodegradability of pharmaceutical compounds in agricultural soils irrigated with treated wastewater. *Environmental Pollution, 185*, 168–177. doi:10.1016/j.envpol.2013.10.038

Limmer, M. A., & Burken, J. G. (2014). Plant Translocation of Organic Compounds: Molecular and Physicochemical Predictors. *Environmental Science* & *Technology Letters, 1*, 156–161. doi:10.1021/ez400214q

Mamy, L., Patureau, D., Barriuso, E., Bedos, C., Bessac, F., Louchart, X., . . . Benoit, P. (2014). Prediction of the Fate of Organic Compounds in the Environment From Their Molecular Properties: A Review. *Critical Reviews in Environmental Science* & *Technology, 45*, 1277–1377. doi:10.1080/10643389.2014.955627

Naylor, D., McClure, R., & Jansson, J. (2022). Trends in Microbial Community Composition and Function by Soil Depth. *Microorganisms, 10*, 540. doi:10.3390/microorganisms10030540

Posit Team. (2023). RStudio: Integrated development environment for R. (version: 2023.06.2+561.pro5). Posit Software, PBC [software]. <https://www.posit.co>

R Core Team. (2022). R: A language and environment for statistical computing. Vienna, Austria. R Foundation for Statistical Computing [software]. <https://www.R-project.org/>

Ren, X., Zeng, G., Tang, L., Wang, J., Wan, J., Liu, Y., . . . Deng, R. (2018). Sorption, transport and biodegradation – An insight into bioavailability of persistent organic pollutants in soil. *Science of The Total Environment, 610-611*, 1154–1163. doi:10.1016/j.scitotenv.2017.08.089

Rietra, R. P., Berendsen, B. J., Mi-Gegotek, Y., Römkens, P. F., & Pustjens, A. M. (2024). Prediction of the mobility and persistence of eight antibiotics based on soil characteristics. *Heliyon, 10*, e23718. doi:10.1016/j.heliyon.2023.e23718

Ritchie, J. T. (1972). Model for predicting evaporation from a row crop with incomplete cover. *Water Resources Research, 8*, 1204–1213. doi:10.1029/wr008i005p01204

Rustler, M. (2025). kwb.hydrus1d: R Interface for the Last Official Release of Hydrus1D (V4.17.0140) for Windows. R package version 0.1.0, <https://github.com/KWB-R/kwb.hydrus1d>.

Sigmund, G., Gharasoo, M., Hüffer, T., & Hofmann, T. (2020). Deep Learning Neural Network Approach for Predicting the Sorption of Ionizable and Polar Organic Pollutants to a Wide Range of Carbonaceous Materials. *Environmental Science* & *Technology, 54*, 4583–4591. doi:10.1021/acs.est.9b06287

Šimůnek, J., & van Genuchten, M. T. (2008). Modeling Nonequilibrium Flow and Transport Processes Using HYDRUS. *Vadose Zone Journal, 7*, 782–797. doi:10.2136/vzj2007.0074

Thalmann, M., Hohenbrink, T. L., Klitzke, S., Ruhl, A. S., & Peters, A. (2025). Prediction tool for assessing groundwater contamination risk under irrigation with reclaimed water (Version 1.0.1) [Software]. Zenodo. https://doi.org/10.5281/zenodo.17287510

Veeh, R. H., Inskeep, W. P., & Camper, A. K. (1996). Soil Depth and Temperature Effects on Microbial Degradation of 2,4‐D. *Journal of Environmental Quality, 25*, 5–12. doi:10.2134/jeq1996.00472425002500010002x

Walker, A. (1978). Simulation of the persistence of eight soil‐applied herhicides. *Weed Research, 18*, 305–313. doi:10.1111/j.1365-3180.1978.tb01165.x

Walker, A., & Barnes, A. (1981). Simulation of herbicide persistence in soil; a revised computer model. *Pesticide Science, 12*, 123–132. doi:10.1002/ps.2780120204

Wickham, H. (2023a). stringr: Simple, consistent wrappers for common string operations. R package version 1.5.1. Available at: https://CRAN.R-project.org/package=stringr (accessed June 10, 2024).

Wickham, H. (2023b). ggplot2: Create elegant data visualisations using the grammar of graphics. R package version 3.5.0. Available at: https://CRAN.R-project.org/package=ggplot2 (accessed July 24, 2025).

Zhang, Z., Wang, S., Brown, T. N., Sangion, A., Arnot, J. A., & Li, L. (2024). Modeling sorption of environmental organic chemicals from water to soils. *Water Research X, 22*, 100219. doi:10.1016/j.wroa.2024.100219
